# Supplementary material
Source: Springer Nature journal article supplement (https://www.springermedizin.de/resource/supplementary/13229_2012_67_MOESM5_ESM.pdf/9676090)
Supplement: MOESM5 [file 9676090]

Additional Table 5. Expression microarray data for genes involved in tryptophan metabolic pathways in 10 patients with ASDs versus 10 controls.

| Gene Symbol                       | Control Average | AUT1   | AUT2  | AUT3  | AUT4  | AUT5  | AUT6  | AUT7  | AUT8  | AUT9  | AUT10 |
|-----------------------------------|-----------------|--------|-------|-------|-------|-------|-------|-------|-------|-------|-------|
| <i>AADAT</i>                      | 100             | 33     | 29    | 40    | 36    | 36    | 69    | 37    | 54    | 52    | 26    |
| <i>ACMSD</i>                      | 29              | 17     | 33    | 40    | 24    | 23    | 28    | 17    | 34    | 15    | 6     |
| <i>HAAO</i>                       | 1201            | 1159   | 455   | 285   | 743   | 566   | 992   | 641   | 697   | 918   | 374   |
| <i>KMO</i>                        | 1167            | 1890   | 1217  | 763   | 646   | 629   | 1311  | 896   | 705   | 723   | 288   |
| <i>KYNU</i>                       | 9312            | 12141  | 9682  | 3832  | 5647  | 4633  | 10400 | 8417  | 7019  | 9868  | 4566  |
| <i>MAOA</i>                       | 781             | 422    | 437   | 246   | 394   | 247   | 567   | 354   | 411   | 542   | 153   |
| <i>QPRT</i>                       | 51099           | 120513 | 89478 | 41459 | 76330 | 59482 | 68206 | 45937 | 62899 | 68640 | 30829 |
| <i>TDO2</i>                       | 43              | 250    | 118   | 50    | 28    | 36    | 38    | 14    | 29    | 40    | 45    |
| <i>TPH1</i>                       | 35              | 27     | 33    | 41    | 27    | 29    | 27    | 15    | 36    | 15    | 9     |
| <i>TPH2</i>                       | 58              | 22     | 43    | 35    | 28    | 35    | 32    | 22    | 41    | 31    | 11    |
| <i>WARS</i> (cytoplasmic form)    | 60518           | 68775  | 81421 | 64014 | 64490 | 50202 | 55002 | 33855 | 43543 | 42147 | 22084 |
| <i>WARS2</i> (mitochondrial form) | 2207            | 2812   | 1707  | 630   | 790   | 689   | 1250  | 1387  | 1717  | 2250  | 977   |
| <i>SLC3A2</i>                     | 24016           | 20724  | 32092 | 18967 | 20111 | 13763 | 21640 | 20804 | 24236 | 25123 | 8286  |
| <i>SLC7A5</i>                     | 4513            | 1641   | 4189  | 4972  | 3944  | 1595  | 3028  | 2382  | 3313  | 2782  | 905   |
| <i>SLC7A8</i>                     | 95              | 22     | 19    | 43    | 29    | 23    | 38    | 18    | 29    | 48    | 9     |
